# Supplementary material for: Evaluation of the Thermal Behavior, Synergistic Catalysis, and Pollutant Emissions during the Co-Combustion of Sewage Sludge and Coal Gasification Fine Slag Residual Carbon
Source: MDPI journal article supplement (doi:10.3390/catal11101142), 2021-09-23
Supplement: s1 [file s1]

# Supporting Information

## **Evaluation on Thermal Behavior, Synergistic Catalysis, and Pollutant Emissions during the Co-combustion of Sewage Sludge and Coal Gasification Fine Slag Residual Carbon**

Yang Guo <sup>1, 2</sup>, Jianjun Wu <sup>1, 2</sup>, Wenke, Jia <sup>1, 2</sup>, Fanhui Guo <sup>1, 2</sup>, Guofeng Qiu <sup>1, 2</sup>, Rumeng Wang <sup>1, 2</sup>,

Yixin Zhang <sup>2, 3 \*</sup>, and Baiqian Dai <sup>4, 5 \*</sup>

<sup>1</sup> School of Chemical Engineering and Technology, China University of Mining and Technology, Xuzhou 221116, China

<sup>2</sup> National Engineering Research Center of Coal Preparation and Purification, China University of Mining and Technology, Xuzhou 221116, China

<sup>3</sup> Shandong Xuanyuan Scientific Engineering and Industrial Technology Research Institute Co., Ltd., Longgu, Juye, Heze 274918, China

<sup>4</sup> Department of Chemical Engineering, Monash University, Clayton, VIC, 3800, Australia

<sup>5</sup> Monash Suzhou Research Institute, SIP, Suzhou, 215028, China

\* Correspondence: yixinzhang@cumt.edu.cn (Yixin Zhang), Bai-Qian.Dai@monash.edu (Baiqian Dai)

The list of supplementary tables and figures:

**Table S1.** Kinetic mechanism functions.

**Table S2.** Kinetic parameters of various samples at different combustion stage.

**Table S3.** The kinetic parameters of 40SS60RC and 40DSS60RC.

**Figure S1.** Comparison of the DTG results of 40SS60RC and 40DSS60RC.

**Table S1.** Kinetic mechanism functions.

| Kinetic mechanism functions                                   | $g(\alpha)$                             |
|---------------------------------------------------------------|-----------------------------------------|
| O1, Chemical reaction, First-order                            | $-\ln(1 - \alpha)$                      |
| O2, Chemical reaction, Second-order                           | $(1 - \alpha)^{-1}$                     |
| O3, Chemical reaction, Third-order                            | $(1 - \alpha)^{-2}$                     |
| D1, One-dimensional diffusion                                 | $\alpha^2$                              |
| D2, Two-dimensional diffusion                                 | $(1 - \alpha) \ln(1 - \alpha) + \alpha$ |
| D3, Three-dimensional diffusion, Spherical model              | $[1 - (1 - \alpha)^{1/3}]^2$            |
| D4, Three-dimensional diffusion, Outside of a spherical model | $1 - 2\alpha/3 - (1 - \alpha)^{2/3}$    |

**Table S2.** Kinetic parameters of various samples at different combustion stage.

| Samples | Combustion stage | Kinetic mechanism functions | Coats-Redfern method                 |               |
|---------|------------------|-----------------------------|--------------------------------------|---------------|
|         |                  |                             | Kinetic equation                     | $R^2$         |
| SS      | Stage 1          | O1                          | <b><math>Y=-2286.5X-9.3</math></b>   | <b>0.9812</b> |
|         |                  | O2                          | $Y=3324.6X-6.2$                      | 0.8986        |
|         |                  | O3                          | $Y=-7952.7X+2.6$                     | 0.9211        |
|         |                  | D1                          | $Y=-2555.1X-10.1$                    | 0.7503        |
|         |                  | D2                          | $Y=-3312.5X-9.2$                     | 0.8404        |
|         |                  | D3                          | $Y=-4488.7X-8.4$                     | 0.9282        |
|         |                  | D4                          | $Y=-3688.3X-10.0$                    | 0.8761        |
| RC      | Stage 2          | O1                          | <b><math>Y=-12711.1X+18.4</math></b> | <b>0.9789</b> |
|         |                  | O2                          | $Y=-50289.5X+48.2$                   | 0.8949        |
|         |                  | O3                          | $Y=-102686.4X+111.9$                 | 0.8980        |

|          |         |    |                                     |               |
|----------|---------|----|-------------------------------------|---------------|
| 20SS80RC | Stage 1 | D1 | $Y=-22390.0X+12.1$                  | 0.7160        |
|          |         | D2 | $Y=-28645.5X+19.2$                  | 0.7657        |
|          |         | D3 | $Y=-40197.6X+31.9$                  | 0.8371        |
|          |         | D4 | $Y=-32203.3X+22.1$                  | 0.7930        |
|          |         | O1 | <b><math>Y=-4051.0X+20.1</math></b> | <b>0.9714</b> |
|          |         | O2 | $Y=-4236.7X+23.2$                   | 0.9512        |
|          |         | O3 | $Y=-4409.15X+27.5$                  | 0.9043        |
|          |         | D1 | $Y=-3956.6X-11.0$                   | 0.9286        |
|          | Stage 2 | D2 | $Y=-4050.3X-11.4$                   | 0.9318        |
|          |         | D3 | $Y=-4641.8X-12.7$                   | 0.9350        |
|          |         | D4 | $Y=-4082.5X-12.9$                   | 0.9329        |
|          |         | O1 | <b><math>Y=-6644.2X+18.0</math></b> | <b>0.9844</b> |
|          |         | O2 | $Y=-7058.0X+21.3$                   | 0.8085        |
|          |         | O3 | $Y=-5768.5X+15.2$                   | 0.8174        |
|          |         | D1 | $Y=-6479.1X+14.4$                   | 0.8871        |
|          |         | D2 | $Y=-7417.0X+16.5$                   | 0.9013        |
| 40SS60RC | Stage 1 | D3 | $Y=-8751.1X+21.7$                   | 0.8989        |
|          |         | D4 | $Y=-8432.2X+19.9$                   | 0.9233        |
|          |         | O1 | <b><math>Y=-3633.6X-11.1</math></b> | <b>0.9691</b> |
|          |         | O2 | $Y=-3815.0X-13.2$                   | 0.9235        |
|          |         | O3 | $Y=-4947.2X-20.5$                   | 0.9107        |
|          |         | D1 | $Y=-4575.0X-8.7$                    | 0.9244        |
|          |         | D2 | $Y=-4779.0X-9.0$                    | 0.9310        |
|          |         | D3 | $Y=-4995.2X-10.1$                   | 0.9375        |
|          | Stage 2 | D4 | $Y=-4851.1X-10.4$                   | 0.9333        |
|          |         | O1 | <b><math>Y=-6181.1X+3.3</math></b>  | <b>0.9573</b> |

|          |         |    |                                     |               |
|----------|---------|----|-------------------------------------|---------------|
| 60SS40RC | Stage 1 | O2 | $Y=-6658.3X+5.2$                    | 0.9102        |
|          |         | O3 | $Y=-6947.2X+7.5$                    | 0.8876        |
|          |         | D1 | $Y=-5145.0X+24.4$                   | 0.9213        |
|          |         | D2 | $Y=-6107.0X+22.5$                   | 0.9009        |
|          |         | D3 | $Y=-6751.1X+21.7$                   | 0.9227        |
|          |         | D4 | $Y=-6832.2X+20.9$                   | 0.9235        |
|          |         | O1 | <b><math>Y=-4308.4X-10.4</math></b> | <b>0.9828</b> |
|          |         | O2 | $Y=-5315.0X-12.6$                   | 0.9012        |
|          | Stage 2 | O3 | $Y=-5947.2X-13.4$                   | 0.9680        |
|          |         | D1 | $Y=-4437.2X-8.14$                   | 0.9093        |
|          |         | D2 | $Y=-4757.8X-8.2$                    | 0.9215        |
|          |         | D3 | $Y=-5110.8X-9.0$                    | 0.9333        |
|          |         | D4 | $Y=-4875.2X-9.4$                    | 0.9257        |
|          |         | O1 | $Y=-8135.8X-3.1$                    | 0.9002        |
|          |         | O2 | $Y=-8459.8X-5.2$                    | 0.8863        |
|          |         | O3 | $Y=-9147.2X-7.5$                    | 0.8971        |
| 80SS20RC | Stage 1 | D1 | $Y=-5658.2X-7.2$                    | 0.9187        |
|          |         | D2 | $Y=-7124.2X-4.5$                    | 0.9432        |
|          |         | D3 | <b><math>Y=-7836.2X-2.2</math></b>  | <b>0.9806</b> |
|          |         | D4 | $Y=-7639.4X-1.9$                    | 0.9567        |
|          |         | O1 | <b><math>Y=-4759.4X-9.8</math></b>  | <b>0.9803</b> |
|          |         | O2 | $Y=-5315.0X-11.2$                   | 0.9234        |
|          |         | O3 | $Y=-5947.2X-17.5$                   | 0.9416        |
|          |         | D1 | $Y=-4853.0X-4.4$                    | 0.8946        |
|          |         | D2 | $Y=-4107.0X-2.5$                    | 0.9025        |
|          |         | D3 | $Y=-5751.1X-5.7$                    | 0.9198        |

|           |         |    |                                      |               |
|-----------|---------|----|--------------------------------------|---------------|
| 40DSS60RC | Stage 2 | D4 | $Y=-6074.3X-9.2$                     | 0.8909        |
|           |         | O1 | $Y=-9174.8X-9.9$                     | 0.9104        |
|           |         | O2 | $Y=-10315.0X-13.2$                   | 0.9325        |
|           |         | O3 | $Y=-9947.2X-10.5$                    | 0.9057        |
|           |         | D1 | $Y=-8198.7X-14.4$                    | 0.8924        |
|           |         | D2 | $Y=-8207.0X-12.2$                    | 0.8819        |
|           |         | D3 | $Y=-8375.1X-11.7$                    | 0.9361        |
|           |         | D4 | <b><math>Y=-8421.9X-10.9</math></b>  | <b>0.9660</b> |
|           |         | O1 | <b><math>Y=-3835.70X-12.4</math></b> | <b>0.9844</b> |
|           |         | O2 | $Y=-4705.6X-9.2$                     | 0.9304        |
|           | Stage 1 | O3 | $Y=-5122.3X-7.8$                     | 0.9128        |
|           |         | D1 | $Y=-5068.9X-16.0$                    | 0.8656        |
|           |         | D2 | $Y=-5397.1X-14.4$                    | 0.8874        |
|           |         | D3 | $Y=-5308.2X-13.0$                    | 0.8512        |
|           |         | D4 | $Y=-5742.3X-8.6$                     | 0.8975        |
|           |         | O1 | <b><math>Y=-8204.2X+15.9</math></b>  | <b>0.9787</b> |
|           |         | O2 | $Y=-9021.6X+18.2$                    | 0.9501        |
|           | Stage 2 | O3 | $Y=-9877.4X+21.5$                    | 0.9534        |
|           |         | D1 | $Y=-9107.8X+24.3$                    | 0.9011        |
|           |         | D2 | $Y=-9589.1X+29.2$                    | 0.9226        |
|           |         | D3 | $Y=-11021.3X+19.7$                   | 0.8998        |
|           |         | D4 | $Y=-9698.2X+9.8$                     | 0.9115        |

---

Table S3. The kinetic parameters of 40SS60RC and 40DSS60RC.

| Samples   | Stage 1        |       |        | Stage 2        |       |        |
|-----------|----------------|-------|--------|----------------|-------|--------|
|           | $E_a$ (kJ/mol) | Model | $R^2$  | $E_a$ (kJ/mol) | Model | $R^2$  |
| 40SS60RC  | 30.21          | O1    | 0.9691 | 51.39          | O1    | 0.9573 |
| 40DSS60RC | 31.89          | O1    | 0.9844 | 68.21          | O1    | 0.9678 |

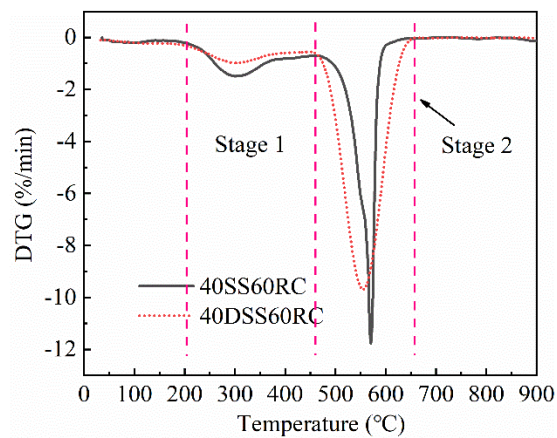

**Figure S1.** Comparison of the DTG results of 40SS60RC and 40DSS60RC.
